# Supplementary material for: CD14 blockade in a translational model of reperfused ST-elevation myocardial infarction with key clinical features.
Source: Research Square preprint supplement (doi:10.21203/rs.3.rs-5545726/v1), 2025-03-19
Supplement: Supplementary file 1 [file 15638c8f292d6efd99b722a6.pdf]

## DATA AND CODE AVAILABILITY

All supporting data are available from data repositories. All primary data are available upon request from the corresponding author or trial sponsor.

## SUPPLEMENTARY RESULTS

### Safety Profile of CD14 Blockade with Anti-CD14 Antibody

No adverse events were observed following anti-CD14 treatment commencement (**Supplementary Table S1**). Left atrial thrombus was observed in one mouse in the isotype-treated group only (7-days post-STEMI cohort).

### Model of Reperfused Anterior STEMI Develops Progressive LV Systolic Dysfunction, Remodeling, and Hemodynamic Decompensation following STEMI

Following 1 h of LAD coronary artery occlusion and closed chest reperfusion, hearts had an AAR comprising approximately 50 % of the total LV (see **Supplementary Figure S3B-D**), and hearts of saline-treated control mice developed an acute infarct size of  $65 \pm 4$  (% of AAR) measured by planimetric analysis of serially sectioned and dual-stained (by Evans blue/tri-tetrazolium chloride) whole hearts excised 24 h post-STEMI (**Supplementary Figure S3C**). At 24 h post-STEMI, untreated mice exhibited depressed LV systolic function ( $29 \pm 2$  % EF) with evidence of early adverse remodeling i.e. increased end-diastolic volume ( $74 \pm 3$   $\mu$ l EDV), observed by ultra-high frequency parasternal long axis echocardiography (**Supplementary Figure S3E-I**), partially associated with acute myocardial stunning.

At 3 days post-STEMI, untreated mice presented with similar LV systolic dysfunction ( $31 \pm 1$  % EF) and dilatation ( $74 \pm 3$   $\mu$ l EDV, **Supplementary Figure S3J-N**).

At 7 days post-STEMI without treatment, LV dilatation remained stable ( $77 \pm 3$  vs  $74 \pm 3$   $\mu$ l EDV at D3 post-STEMI,  $p=0.549$ ). However, systolic dysfunction progressively worsened without treatment ( $25 \pm 1$  vs  $31 \pm 1$  % EF at D3 post-STEMI,  $p<0.001$ ) alongside reduced LV stroke volume ( $19 \pm 1$  vs  $23 \pm 1$   $\mu$ l at D3,

p<0.01) and cardiac output ( $9.9\pm0.4$  vs  $12.5\pm0.5$  ml/min at D3, p<0.001) (**Figure 2B, text**). Invasive hemodynamics were similarly impacted at 7 days post-STEMI, including significantly reduced developed pressure (i.e. delta between end-systolic end-diastolic LV pressure;  $78\pm2$  vs  $92\pm3$  mmHg in shams, p<0.05), and approximately halved LV stroke work ( $1,103\pm63$  vs  $2,075\pm309$  mmHg x  $\mu$ l in shams, p<0.001), assessed by LV pressure-volume (PV) catheterization (**Figure 2C, text**).

At 21 days post-STEMI, cardiac magnetic resonance (CMR) imaging provided an additional assessment of LV volumes, further validating echocardiographic observations of LV dilatation without treatment (i.e.  $102\pm8$   $\mu$ l in saline controls). At 28 days, echocardiography showed that LV systolic dysfunction had remained depressed but stable compared with day 7 ( $24\pm1$  vs  $25\pm2\%$  EF at D7 post-STEMI, p=0.560), alongside progressive LV dilatation ( $111\pm6$  vs  $77\pm3$   $\mu$ l EDV at D7 post-STEMI, p<0.001, **Figure 2F, text**). Global longitudinal strain (GLS) of the LV was also suppressed at this timepoint ( $-6.8\pm0.3$  vs  $-12.6\pm0.7\%$  in shams, p<0.001). As observed at day 7 post-STEMI, LV developed pressure remained depressed at 28 days ( $80\pm2$  vs  $91\pm2$  mmHg in shams, p<0.01) with the additional development of reduced +dP/dT ( $6,902\pm248$  vs  $9,446\pm497$  in shams, p<0.01) and -dP/dT ( $-5,928\pm476$  vs  $-8,737\pm443$  in shams, p<0.01) at this timepoint (**Figure 2G, text**).

Together these changes are reflected in a shrinking and overt rightward shift of the PV loop between days 7 and 28 in this model of murine STEMI (**Figure 2**). In our extensive experience with this model, no significant additive functional decompensation or remodeling is observed beyond 28 days post-STEMI.

## 1 SUPPLEMENTARY TABLES AND FIGURES

| Adverse Events                    | Saline<br>(n=76) | Isotype<br>(n=66) | Anti-CD14<br>(n=102) |
|-----------------------------------|------------------|-------------------|----------------------|
| Atrial thrombus (%)               | 0 (0%)           | 1 (1.5%)          | 0 (0%)               |
| Cardiac rupture (%)               | 0 (0%)           | 0 (0%)            | 0 (0%)               |
| Lung congestion (%)               | 0 (0%)           | 0 (0%)            | 0 (0%)               |
| Aneurism (%)                      | 0 (0%)           | 0 (0%)            | 0 (0%)               |
| Evidence of infection (%)         | 0 (0%)           | 0 (0%)            | 0 (0%)               |
| Death or emergency euthanasia (%) | 0 (0%)           | 0 (0%)            | 0 (0%)               |

2 **Supplementary Table S1. Safety and Adverse Events.** Including all observations at post-mortem in animals that  
3 survived 1 h ischemia and received any treatment by intravenous injection at time of reperfusion.

4

5

| Stain or Antibody   | Supplier (Cat #)                                      |
|---------------------|-------------------------------------------------------|
| Masson's trichrome  | Sigma-Aldrich, Stenheim, DE (HT15)                    |
| Picrosirius red     | Sigma-Aldrich, Stenheim, DE (2610-10-8)               |
| Anti-CD68           | Abcam, Waltham, Waltham, US (Ab125212)                |
| Anti-troponin T     | ThermoFisher Scientific, Grand Island, US (MA5-12960) |
| DAPI, hydrochloride | ThermoFisher Scientific, Grand Island, US (D1306)     |

6 **Supplementary Table S2. (Immuno)histochemical approach and reagents**

| <b>Cell type</b>             | <b>Antibody signature (staining pattern)</b> |
|------------------------------|----------------------------------------------|
| Viable Leukocytes            | CD45+                                        |
| Granulocytes                 | CD45+, CD11b+, Ly6G+                         |
| Macrophages                  | CD45+, CD11b+, CD64+                         |
| CD14+ Macrophages            | CD45+, CD11b+, CD64+, CD14+                  |
| CD14- Macrophages            | CD45+, CD11b+, CD64+, CD14-                  |
| MHCII-hi Macrophages         | CD45+, CD11b+, CD64+, MHCII+                 |
| MHCII-hi Mrc1+ Macrophages   | CD45+, CD11b+, CD64+, MHCII+, MRC1+          |
| MHCII-low; Mrc1+ Macrophages | CD45+, CD11b+, CD64+, MHCII-, MRC1+          |
| MHCII-low Macrophages        | CD45+, CD11b+, CD64+, MHCII-                 |
| Myeloids                     | CD45+, CD11b+, Ly6G-                         |
| Non-myeloids                 | CD45+, CD11b-, Ly6G-                         |

**1 Supplementary Table S3. Leukocyte subtype staining patterns**

2

| <i>Flow cytometry</i>        |                     |             |                              |              |                 |
|------------------------------|---------------------|-------------|------------------------------|--------------|-----------------|
| <b><u>Antibody</u></b>       |                     |             |                              |              | <b>Final</b>    |
| <b><u>Target</u></b>         | <b>Dye</b>          | <b>Cat#</b> | <b>Company</b>               | <b>Clone</b> | <b>Dilution</b> |
| CD45                         | APC-Cy7             | 561037      | BD Biosciences, San Jose, US | 30-F11       | 1:400           |
| I-A/I-E<br>(MHCII)           | OptiBuild<br>BUV395 | 743876      | BD Biosciences               | 2G9          | 1:400           |
| CD11b                        | Horizon BUV737      | 612801      | BD Biosciences               | M1/70        | 1:400           |
| CD14                         | Brilliant violet    | 123337      | Biolegend, San Diego, US     | Sa14-2       | 1:200           |
| Ly-6C                        | FITC                | 128005      | Biolegend                    | HK1.4        | 1:400           |
| Ly-6G                        | PE/dazzle           | 127647      | Biolegend                    | 1A8          | 1:200           |
| CD64 (a & b<br>alloantigens) | PE/cyanine7         | 139313      | Biolegend                    | X54- 5/7.1   | 1:200           |
| CD206 (Mrc1)                 | AF647               | 141711      | Biolegend                    | C068C2       | 1:200           |
| N/A (nucleus)                | DAPI (1 mg/mL)      | D9542       | Sigma Aldrich                | N/A          | 1:1000          |
| <i>scRNA-seq</i>             |                     |             |                              |              |                 |
| <b><u>Antibody</u></b>       |                     |             |                              |              | <b>Final</b>    |
| <b><u>Target</u></b>         | <b>Dye</b>          | <b>Cat#</b> | <b>Company</b>               | <b>Clone</b> | <b>Dilution</b> |
| CD45                         | APC-Cy7             | 561037      | BD Biosciences               | 30-F11       | 1:400           |
| CD11b                        | Horizon BUV737      | 612801      | BD Biosciences               | M1/70        | 1:400           |
| CD64                         | PE/cyanine7         | 139313      | Biolegend                    | X54- 5/7.1   | 1:200           |
| N/A (nucleus)                | DAPI (1 mg/mL)      | D9542       | Sigma Aldrich                | N/A          | 1:1000          |

1    **Supplementary Table S4. Antibodies used in Flow Cytometry and scRNAseq experiments.**

2

3

4

| Cytokine      | Day 1 post-STEMI               |                               |                               |         | Day 3 post-STEMI              |                               |                               |         | Day 1 vs Day 3    |                    |                      |
|---------------|--------------------------------|-------------------------------|-------------------------------|---------|-------------------------------|-------------------------------|-------------------------------|---------|-------------------|--------------------|----------------------|
|               | Saline<br>(n=10)               | Isotype<br>(n=12)             | Anti-CD14<br>(n=11)           | p-value | Saline<br>(n=20)              | Isotype<br>(n=20)             | Anti-CD14<br>(n=20)           | p-value | Saline<br>p-value | Isotype<br>p-value | Anti-CD14<br>p-value |
| Eotaxin       | 441.86<br>(417.87-<br>585.74)  | 472.42<br>(412.23-<br>548.58) | 464.41<br>(432.69-<br>543.11) | 0.9521  | 561.11<br>(465.12-<br>623.31) | 584.26<br>(494.99-<br>649.69) | 534.07<br>(478.73-<br>600.95) | 0.5730  | 0.4671            | 0.0630             | 0.2828               |
| G-CSF         | 785.92<br>(623.33-<br>1099.86) | 768.05<br>(560.61-<br>996.63) | 711.39<br>(594.12-<br>945.79) | 0.9574  | 319.96<br>(280.25-<br>424.99) | 315.3<br>(258.52-<br>408.36)  | 307.32<br>(247.85-<br>402.96) | 0.6456  | <b>&lt;0.0001</b> | <b>&lt;0.0001</b>  | <b>0.0030</b>        |
| GM-CSF        | 31.42<br>(26.34-<br>39.88)     | 40.78<br>(27.77-<br>46.95)    | 31.37<br>(24.21-<br>43.22)    | 0.2321  | 53.07<br>(50.56-<br>54.98)    | 53.07<br>(51.16-<br>54.33)    | 52.03<br>(50.02-<br>54.02)    | 0.7098  | <b>&lt;0.0001</b> | <b>&lt;0.0001</b>  | <b>&lt;0.0001</b>    |
| IFN $\gamma$  | 4.3 (3.86-<br>7.26)            | 6.63 (3.96-<br>8.59)          | 4.89 (3.51-<br>7.08)          | 0.4033  | 10.99<br>(9.72-<br>11.38)     | 10.8 (10.07-<br>12.18)        | 10.57 (9.77-<br>11.56)        | 0.8542  | <b>&lt;0.0001</b> | <b>&lt;0.0001</b>  | <b>&lt;0.0001</b>    |
| IL-1 $\alpha$ | 312.12<br>(271.34-<br>404.27)  | 375.78<br>(301.31-<br>396.96) | 328.44<br>(262.47-<br>395.71) | 0.6992  | 436.39<br>(415.04-<br>455.32) | 451.43<br>(433.48-<br>471.39) | 434 (414.34-<br>461.21)       | 0.2138  | <b>0.0001</b>     | <b>0.0008</b>      | <b>&lt;0.0001</b>    |
| IL-1 $\beta$  | 21.46<br>(19.07-<br>32.89)     | 32.2<br>(20.85-<br>40.71)     | 25.48<br>(18.15-<br>33.24)    | 0.4256  | 47.85<br>(45.98-<br>51.22)    | 49.21<br>(47.17-<br>52.25)    | 46.99<br>(45.05-<br>49.36)    | 0.1614  | <b>&lt;0.0001</b> | <b>&lt;0.0001</b>  | <b>&lt;0.0001</b>    |

|       |                        |                          |                          |        |                           |                           |                           |        |                   |                   |                   |
|-------|------------------------|--------------------------|--------------------------|--------|---------------------------|---------------------------|---------------------------|--------|-------------------|-------------------|-------------------|
| IL-2  | 56.53<br>(51.54-74.45) | 69.29<br>(53.09-77.67)   | 64.62<br>(51.15-73.23)   | 0.7123 | 88.74<br>(85.62-90.71)    | 88.68<br>(86.93-91.43)    | 87.25<br>(86.11-90.52)    | 0.5832 | <b>&lt;0.0001</b> | <b>&lt;0.0001</b> | <b>&lt;0.0001</b> |
| IL-3  | 4.44<br>(3.81-6.74)    | 6.8 (3.79-7.9)           | 4.47 (3.6-6.79)          | 0.2894 | 10.09<br>(9.49-10.51)     | 10.11 (9.19-10.51)        | 10.12 (9.45-10.36)        | 0.9708 | <b>&lt;0.0001</b> | <b>&lt;0.0001</b> | <b>&lt;0.0001</b> |
| IL-4  | 2.11<br>(1.65-3.05)    | 3.24 (1.91-3.61)         | 2.28 (1.63-3.18)         | 0.1614 | 3.94 (3.88-4.09)          | 4 (3.82-4.17)             | 3.9 (3.79-4.15)           | 0.7824 | <b>0.0012</b>     | <b>0.0004</b>     | <b>&lt;0.0001</b> |
| IL-5  | 9.8 (7.2-13.47)        | 12.24<br>(10.13-15.95)   | 8.92 (8.09-11.44)        | 0.0590 | 24.01<br>(17.61-32.65)    | 21.72<br>(14.45-34.23)    | 27.94<br>(21.07-42.28)    | 0.3681 | <b>&lt;0.0001</b> | <b>0.0100</b>     | <b>&lt;0.0001</b> |
| IL-6  | 37.72<br>(18.42-81.49) | 42.02<br>(32.59-49.45)   | 39.02<br>(18.79-114.57)  | 0.9844 | 40.53<br>(22.97-56)       | 30.29<br>(19.98-56.05)    | 32.31<br>(24.26-66)       | 0.6089 | <b>&gt;0.9999</b> | 0.9109            | 0.9708            |
| IL-7  | 12.31<br>(7.78-17.95)  | 15.88<br>(8.13-20.13)    | 15.14<br>(9.93-17.3)     | 0.6637 | 26.41<br>(23.83-28.65)    | 26.67<br>(25.71-28.21)    | 26.54<br>(25.47-30.09)    | 0.7574 | <b>&lt;0.0001</b> | <b>&lt;0.0001</b> | <b>&lt;0.0001</b> |
| IL-9  | 78.47<br>(73.4-105.07) | 117.48<br>(65.89-123.11) | 106.01<br>(68.54-122.23) | 0.8153 | 142.86<br>(137.88-149.36) | 144.59<br>(138.02-151.28) | 141.79<br>(136.45-148.89) | 0.7194 | <b>&lt;0.0001</b> | <b>&lt;0.0001</b> | <b>&lt;0.0001</b> |
| IL-10 | 21.35<br>(16.35-31.2)  | 29.56<br>(17.4-41.26)    | 23.95<br>(15.29-33.27)   | 0.4477 | 44.37<br>(42.01-48.09)    | 45.49<br>(42.85-47.69)    | 44.81<br>(41.51-47.2)     | 0.4331 | <b>&lt;0.0001</b> | <b>0.0002</b>     | <b>&lt;0.0001</b> |

|          |                               |                               |                               |        |                               |                               |                               |        |                   |                   |                   |
|----------|-------------------------------|-------------------------------|-------------------------------|--------|-------------------------------|-------------------------------|-------------------------------|--------|-------------------|-------------------|-------------------|
| IL-12p40 | 39.36<br>(35.78-<br>63.87)    | 56.73<br>(34.78-<br>75.92)    | 47.68<br>(33.48-<br>60.34)    | 0.4315 | 84.82 (81-<br>90.38)          | 86.61<br>(81.62-<br>92.58)    | 81.35 (77.6-<br>90.66)        | 0.5304 | <b>&lt;0.0001</b> | <b>0.0001</b>     | <b>&lt;0.0001</b> |
| IL-12p70 | 123.92<br>(104.03-<br>170.74) | 158.22<br>(121.12-<br>186.97) | 126.27<br>(104.71-<br>170.51) | 0.4441 | 220.91<br>(210.49-<br>232.8)  | 219.22<br>(213.52-<br>227.31) | 214.07<br>(205.49-<br>221.9)  | 0.3504 | <b>&lt;0.0001</b> | <b>&lt;0.0001</b> | <b>&lt;0.0001</b> |
| IL-13    | 58.13<br>(48.14-<br>77.92)    | 71.79<br>(51.44-<br>84.16)    | 62.85<br>(51.56-<br>75.16)    | 0.5241 | 102.34<br>(97.66-<br>105.96)  | 100.06<br>(96.16-<br>104.69)  | 98.86<br>(94.25-<br>100.48)   | 0.2844 | <b>&lt;0.0001</b> | <b>&lt;0.0001</b> | <b>&lt;0.0001</b> |
| IL-15    | 150.97<br>(122.38-<br>182.35) | 172.4<br>(115.34-<br>207.99)  | 185.66<br>(149.7-<br>237.05)  | 0.2452 | 247.56<br>(238.01-<br>261.26) | 258.07<br>(245.49-<br>280.4)  | 271.79<br>(251.38-<br>281.36) | 0.0882 | <b>&lt;0.0001</b> | <b>&lt;0.0001</b> | <b>0.0016</b>     |
| IL-17    | 2.37 (2-<br>3.59)             | 3.45 (2.07-<br>4.1)           | 2.64 (1.87-<br>3.72)          | 0.4766 | 5.04 (4.57-<br>5.19)          | 5.02 (4.73-<br>5.1)           | 4.71 (4.53-<br>4.98)          | 0.0854 | <b>&lt;0.0001</b> | <b>&lt;0.0001</b> | <b>&lt;0.0001</b> |
| IP-10    | 26.53<br>(21.75-<br>31.34)    | 29.29<br>(25.15-<br>35.02)    | 27.81<br>(22.23-<br>34.52)    | 0.4335 | 27.16<br>(25.52-<br>31.09)    | 28.55<br>(24.67-<br>32.78)    | 29.37<br>(27.26-<br>33.13)    | 0.5719 | 0.8151            | 0.9109            | 0.9708            |
| KC       | 150.22<br>(121.55-<br>302.35) | 168.09<br>(117.51-<br>210.73) | 120.22<br>(102.27-<br>181.92) | 0.6917 | 185.48<br>(132.38-<br>306.53) | 149.81<br>(121.72-<br>190.76) | 178.51<br>(115.63-<br>264.11) | 0.3501 | 0.8549            | 0.9542            | 0.8516            |
| LIF      | 4.21<br>(3.31-<br>5.66)       | 4.9 (2.99-<br>6.46)           | 5.05 (3.87-<br>5.98)          | 0.7914 | 7.65 (7.22-<br>7.8)           | 7.99 (7.52-<br>8.47)          | 7.76 (7.41-<br>8.12)          | 0.2807 | <b>0.0008</b>     | <b>&lt;0.0001</b> | <b>&lt;0.0001</b> |



|                |                               |                                |                                |        |                               |                               |                               |        |                   |                   |                   |
|----------------|-------------------------------|--------------------------------|--------------------------------|--------|-------------------------------|-------------------------------|-------------------------------|--------|-------------------|-------------------|-------------------|
| LIX            | 348.07<br>(230.2-<br>924.41)  | 582.33<br>(169.94-<br>1102.93) | 398.24<br>(207.68-<br>1047.17) | 0.9800 | 278.43<br>(226.66-<br>377.98) | 323 (214.93-<br>590.62)       | 319.71<br>(233.55-<br>447.98) | 0.7398 | 0.8151            | 0.9109            | 0.8733            |
| MCP-1          | 131.7<br>(115.11-<br>147.56)  | 150.22<br>(117.9-<br>171.54)   | 126.99<br>(116.19-<br>161.91)  | 0.3818 | 183.06<br>(175.08-<br>187.48) | 182.42<br>(172.95-<br>192.35) | 183.38<br>(172.37-<br>195.57) | 0.8488 | <b>&lt;0.0001</b> | <b>0.0018</b>     | <b>&lt;0.0001</b> |
| M-CSF          | 48.63<br>(40.01-<br>75.08)    | 64.62<br>(43.18-<br>87.57)     | 52.72<br>(40.71-<br>70.71)     | 0.4752 | 96.87<br>(92.66-<br>101.55)   | 96.74<br>(92.45-<br>101.09)   | 93.67<br>(89.89-<br>100.51)   | 0.4850 | <b>&lt;0.0001</b> | <b>0.0046</b>     | <b>&lt;0.0001</b> |
| MIG            | 150.19<br>(42.4-<br>308.31)   | 148.77<br>(47.77-<br>416.27)   | 128.46<br>(41.81-<br>240.62)   | 0.8543 | 62.76<br>(50.41-<br>138.07)   | 82.44 (62.6-<br>129.66)       | 94.67<br>(60.64-<br>151.14)   | 0.3475 | 0.8549            | 0.8610            | 0.9708            |
| MIP-1 $\alpha$ | 105.63<br>(89.16-<br>123.91)  | 115.44<br>(104.59-<br>124.32)  | 97.76<br>(89.66-<br>119.51)    | 0.2167 | 128.52<br>(122.73-<br>134.21) | 129.5<br>(126.16-<br>132.69)  | 129.68<br>(124.78-<br>132.38) | 0.8816 | <b>0.0184</b>     | <b>0.0046</b>     | <b>&lt;0.0001</b> |
| MIP-1 $\beta$  | 107.29<br>(96.8-<br>116.2)    | 120.44<br>(109.01-<br>140.75)  | 102.56<br>(91.24-<br>124.49)   | 0.1280 | 132.67<br>(127.16-<br>137.48) | 133.28<br>(129.28-<br>143.74) | 139.43<br>(127.83-<br>143.89) | 0.4032 | <b>&lt;0.0001</b> | 0.2846            | <b>0.0014</b>     |
| MIP-2          | 315.87<br>(292.56-<br>400.26) | 398.1<br>(298.77-<br>431.24)   | 342.46<br>(291.89-<br>399.89)  | 0.4428 | 469.91<br>(459.66-<br>485.63) | 469.27<br>(453.82-<br>482.34) | 469.29<br>(450.64-<br>479.18) | 0.6822 | <b>&lt;0.0001</b> | <b>&lt;0.0001</b> | <b>&lt;0.0001</b> |
| RANTES         | 21.24<br>(18.3-<br>26.54)     | 26.44<br>(20.57-<br>30.92)     | 25.59<br>(19.86-<br>29.89)     | 0.4891 | 35.91<br>(34.83-<br>38.51)    | 36.37<br>(34.34-<br>37.99)    | 36.27<br>(35.11-38)           | 0.9473 | <b>&lt;0.0001</b> | <b>&lt;0.0001</b> | <b>&lt;0.0001</b> |

|              |                            |                            |                           |        |                           |                            |                            |        |                   |                   |                   |
|--------------|----------------------------|----------------------------|---------------------------|--------|---------------------------|----------------------------|----------------------------|--------|-------------------|-------------------|-------------------|
|              |                            |                            |                           |        |                           |                            |                            |        |                   |                   |                   |
| TNF $\alpha$ | 19.81<br>(17.83-<br>26.87) | 26.44<br>(19.23-<br>31.13) | 20.73<br>(18.89-<br>28.8) | 0.2128 | 33.5<br>(31.96-<br>35.34) | 34.17<br>(32.89-<br>35.28) | 33.02<br>(31.79-<br>34.23) | 0.1627 | <b>&lt;0.0001</b> | <b>&lt;0.0001</b> | <b>&lt;0.0001</b> |
| VEGF         | 1.41<br>(1.17-<br>1.92)    | 1.83 (1.27-<br>2.13)       | 1.36 (1.14-<br>1.86)      | 0.2408 | 2.41 (2.28-<br>2.53)      | 2.46 (2.37-<br>2.53)       | 2.44 (2.31-<br>2.56)       | 0.7974 | <b>&lt;0.0001</b> | <b>&lt;0.0001</b> | <b>&lt;0.0001</b> |

- 1 **Supplementary Table S5. Circulating growth factor and cytokine levels following CD14 Blockade at D1 and D3 post-STEMI.** Biomarker concentrations in pg/ml. Data
- 2 presented as median (Q1-Q3), with Mann-Whitney U-test conducted between D1 and D3 and Kruskal Wallis test to compare between the three groups at each timepoint.

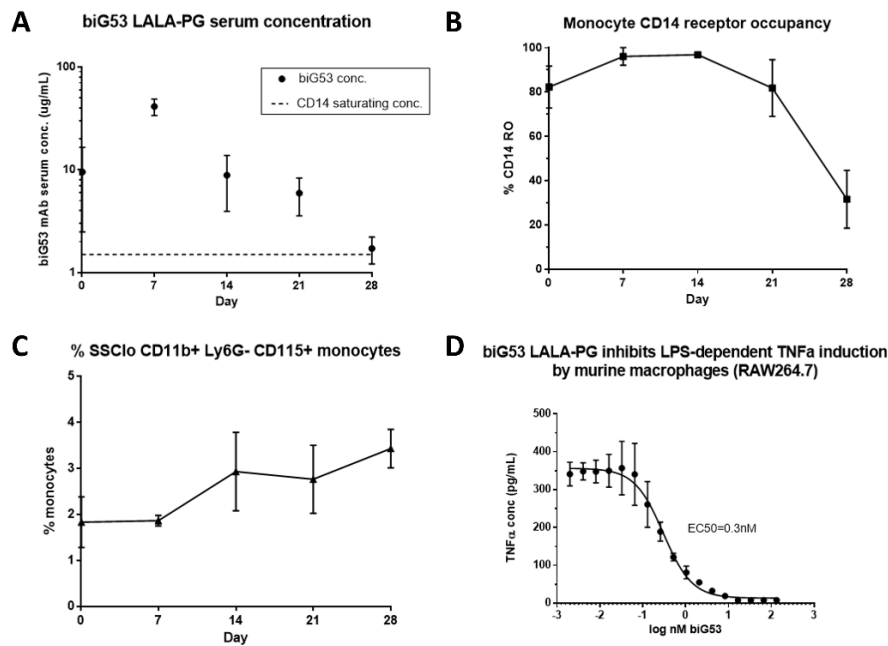

## Supplementary Figure S1. Anti-CD14 serum PK, CD14 receptor occupancy, and monocyte frequency

following a 5 mg/kg anti-CD14 mAb infusion. C57BL6 mice (n=3) received a 5 mg/kg infusion of biG53 LALA-PG mAb (anti-CD14) at day 0, with serum and whole blood collection at 0.5 h, 7-, 14-, 21-, and 28-days post-injection. WinNonlin analysis of anti-CD14 serum levels determined a terminal antibody half-life of 160 h. A) A single 5 mg/kg infusion of anti-CD14 achieves serum concentrations necessary for monocyte CD14 saturation (i.e. 1.5 ug/mL) for ~28 days. *In vitro* titration of anti-CD14 on C57BL6 whole blood, followed by monocyte CD14 receptor occupancy (RO) analysis by flow cytometry demonstrated monocyte CD14 saturation is reached at 1.5 ug/mL (dashed line). B) Monocyte CD14 RO as determined by flow cytometry was 96% over 14 days post-infusion. C) A 5 mg/kg infusion of anti-CD14 does not deplete the SSC lo, CD11b+, Ly6G-, CD115+ population as determined by flow cytometry. Graphed values show the mean and standard deviation. D) anti-CD14 blocks LPS-dependent TNF- $\alpha$  secretion in vitro by RAW264.7 cells stimulated with 10 ng/mL LPS. Complete inhibition of TNF- $\alpha$  secretion is achieved at anti-CD14 concentration of 1.5 ug/mL (i.e. 10 nM), the antibody concentration that saturates monocyte CD14 in whole blood. Mean  $\pm$  SEM.

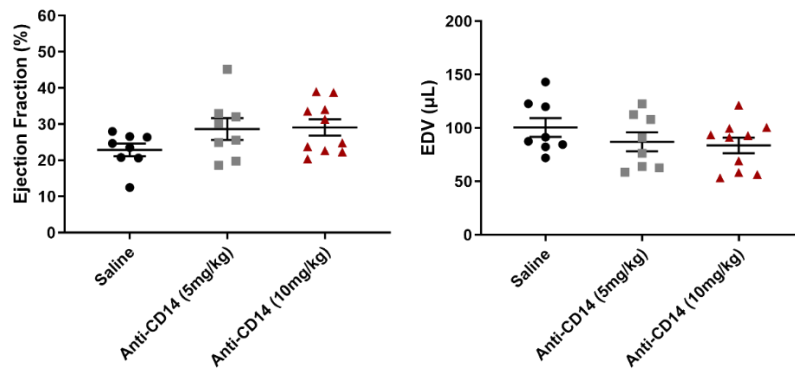

## Supplementary Figure S2. Echocardiographic results of drug dose comparison pilot study measured 7 days

**post-STEMI.** A small pilot study was designed to confirm systolic function (ejection fraction) effect signal; and determine effect size, standard deviation, and lowest effective dose of anti-CD14 antibody treatment delivered using the same protocols used in the main study i.e. administered intravenously at reperfusion, following 1 h occlusion of the left ventricular left anterior descending coronary artery. EDV – end-diastolic volume. No statistical comparisons were performed in this study.

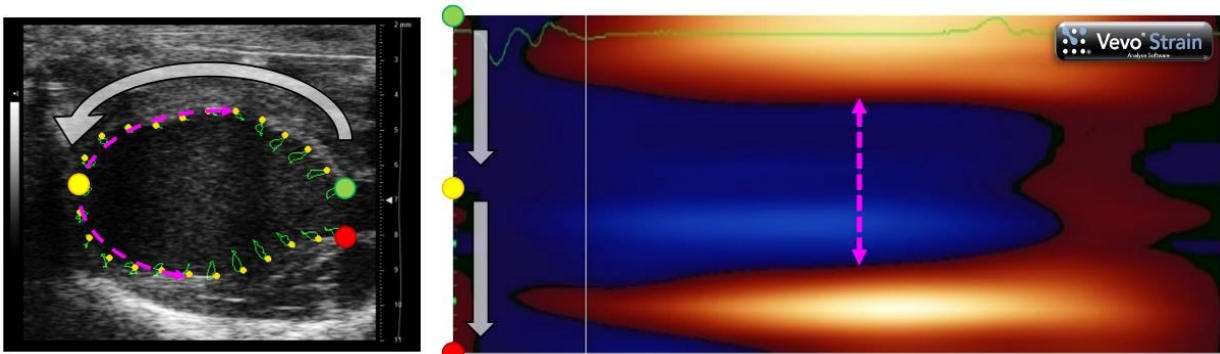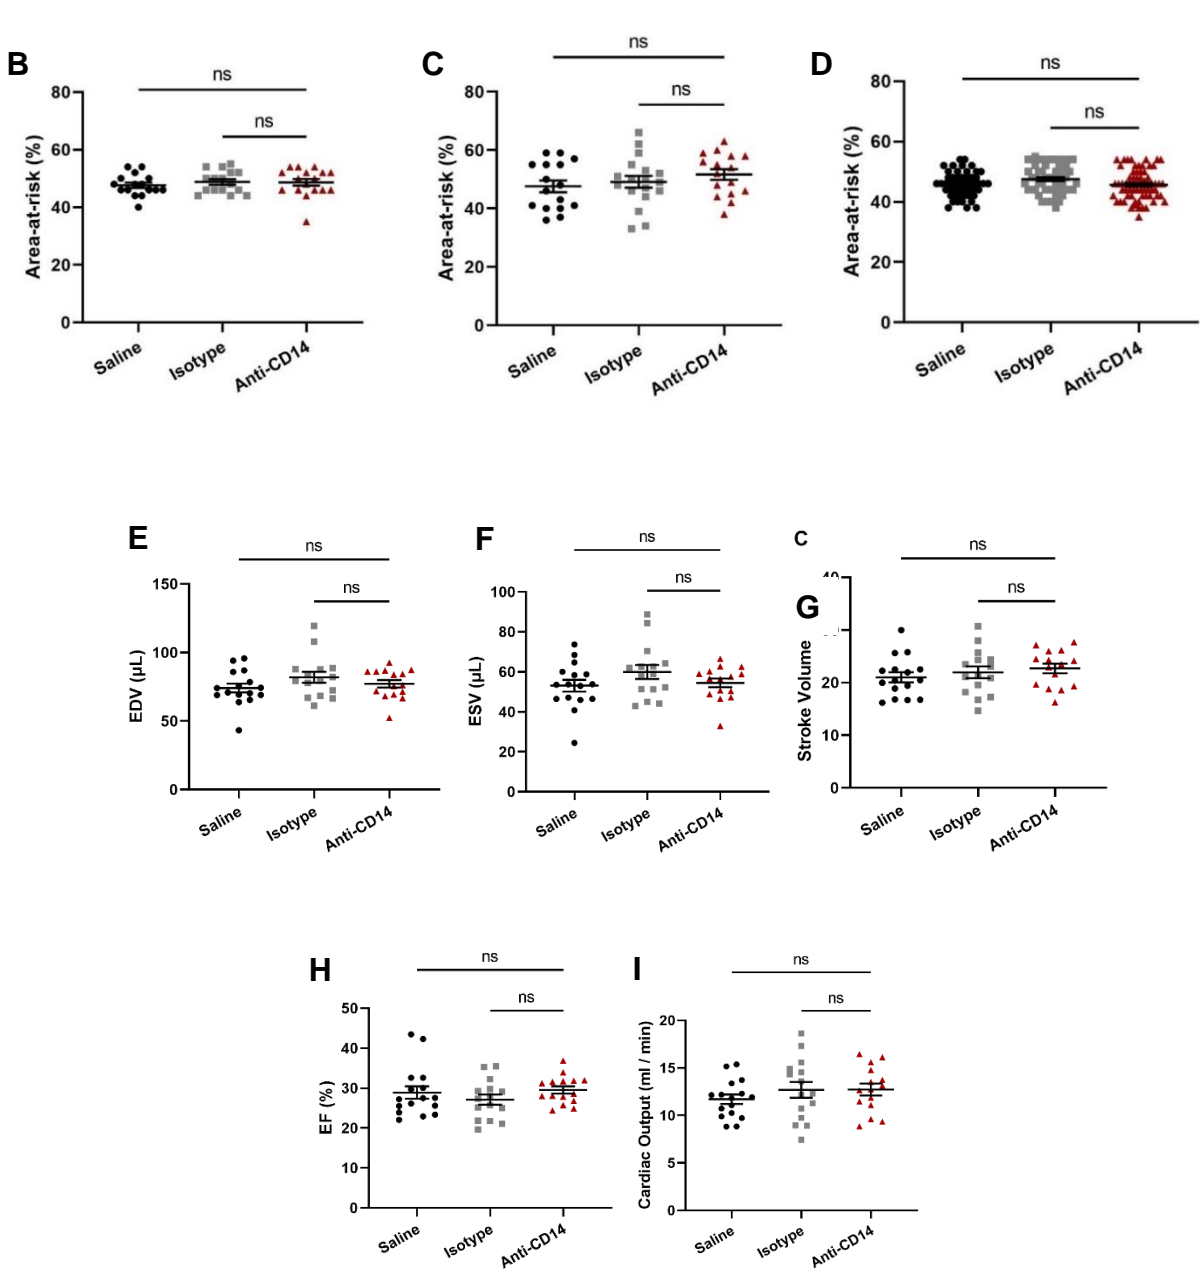

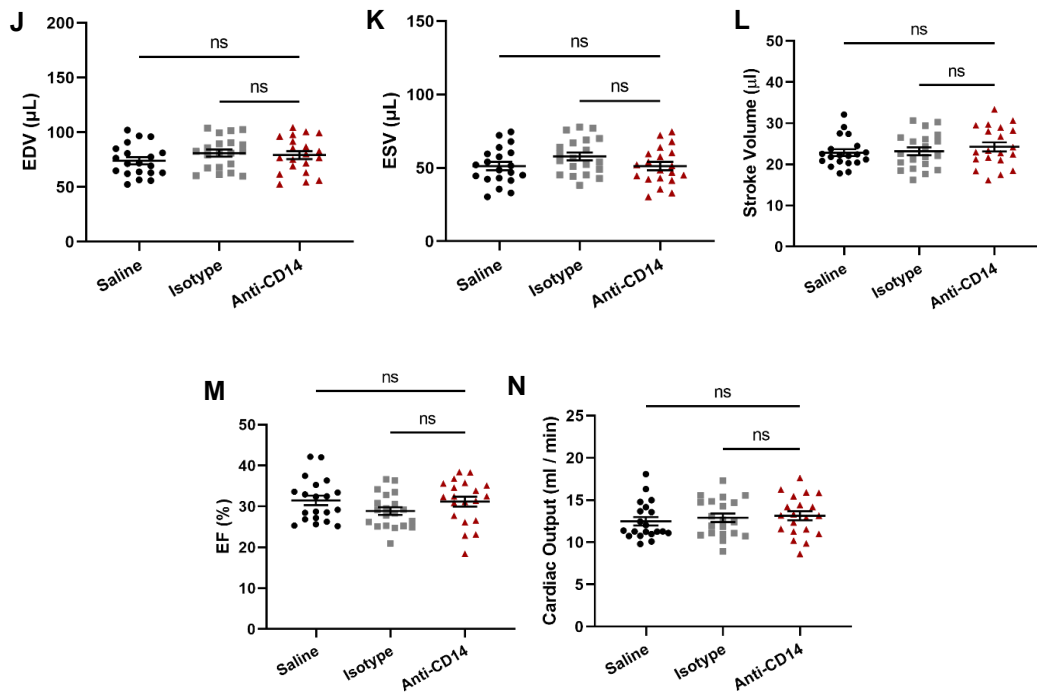

### Supplementary Figure S3. Echocardiographic assessments at 24 hours and 3 days post-STEMI.

A) Relative wall displacement mapping method for assessing area-at-risk. The endocardial circumference was traced to track (left) and map (right) relative tissue displacement in a single cardiac cycle (note EKG overlay, green). Colored circles at the endocardium in B-mode correlate with those fit to the y-axis on the displacement map. The pink line denotes inactive/negative endocardial wall displacement (blue area in map). Left Ventricular Area-at-risk (AAR) at 24 h post-STEMI measured by B) *in vivo* echocardiography, and C) planimetric assessment following post-mortem excision and EB/TTC dual staining of the same hearts. D) Left Ventricular Area-at-risk (AAR) at 24 h post-STEMI across all studies, measured by *in vivo* echocardiography, demonstrating consistency of AAR between groups across all studies. Further echocardiographic assessments at 24 h post-STEMI included left ventricular volumes (E-G), systolic function (H), and cardiac output (I). Echocardiographic assessments at 3 days post-STEMI included left ventricular volumes (J-L), systolic function (M), and cardiac output (N). EDV – end-diastolic volume, ESV – end-systolic volume, EF – ejection fraction, ns – not significant. Mean ± SEM.

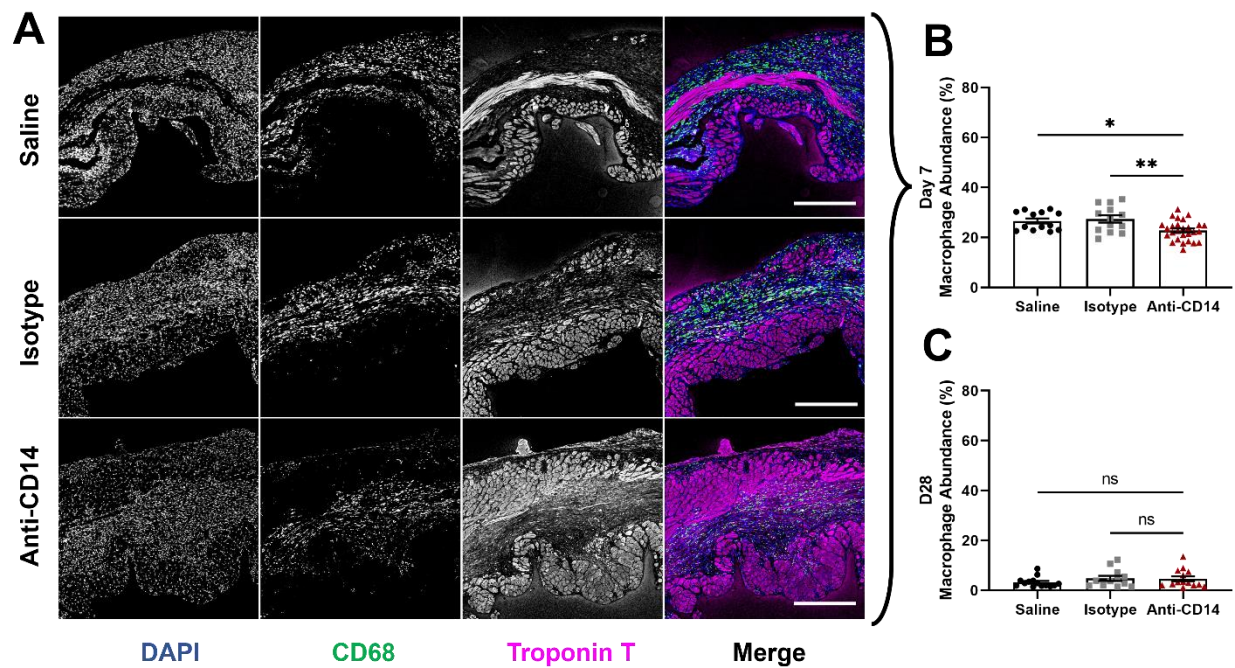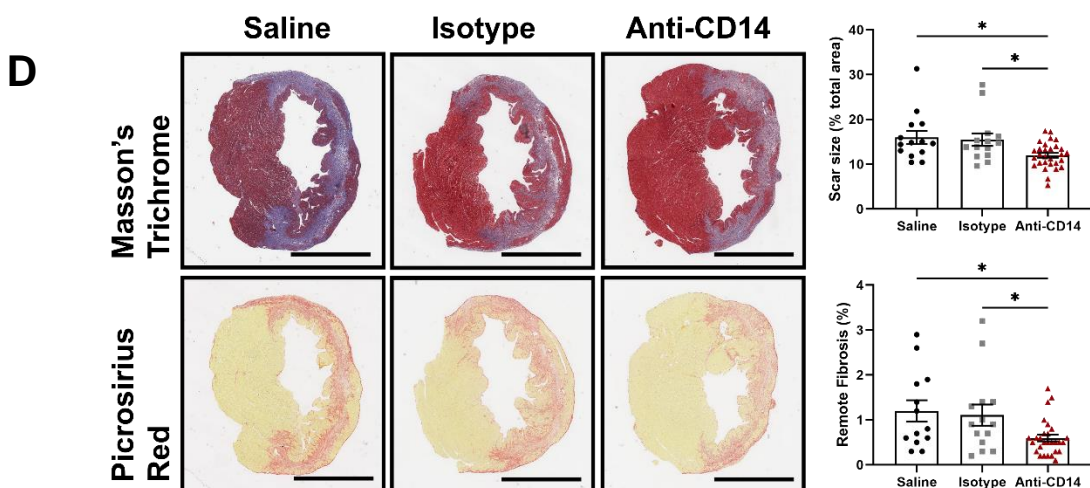

**Supplementary Figure S4. Immunofluorescent imaging of myocardial infiltrates of monocytes and macrophages and histological assessment of fibrosis at 7- or 28-days post-STEMI.** A) Representative immunofluorescent images and B) relative abundance of CD68+ cells in the infarcted myocardium 7 days post-STEMI. C) Relative abundance of CD68+ cells 28 days post-STEMI. D) Representative histological images of Masson's trichrome (upper panels) and picrosirius red (lower panels, bars 500  $\mu$ m) at 7 days post-STEMI, and assessments of scar size (free wall lesion percentage of total area) and remote (non-lesion/septal) fibrosis. Mean  $\pm$  SEM. \*p<0.05, \*\*p<0.01, ns - not significant.



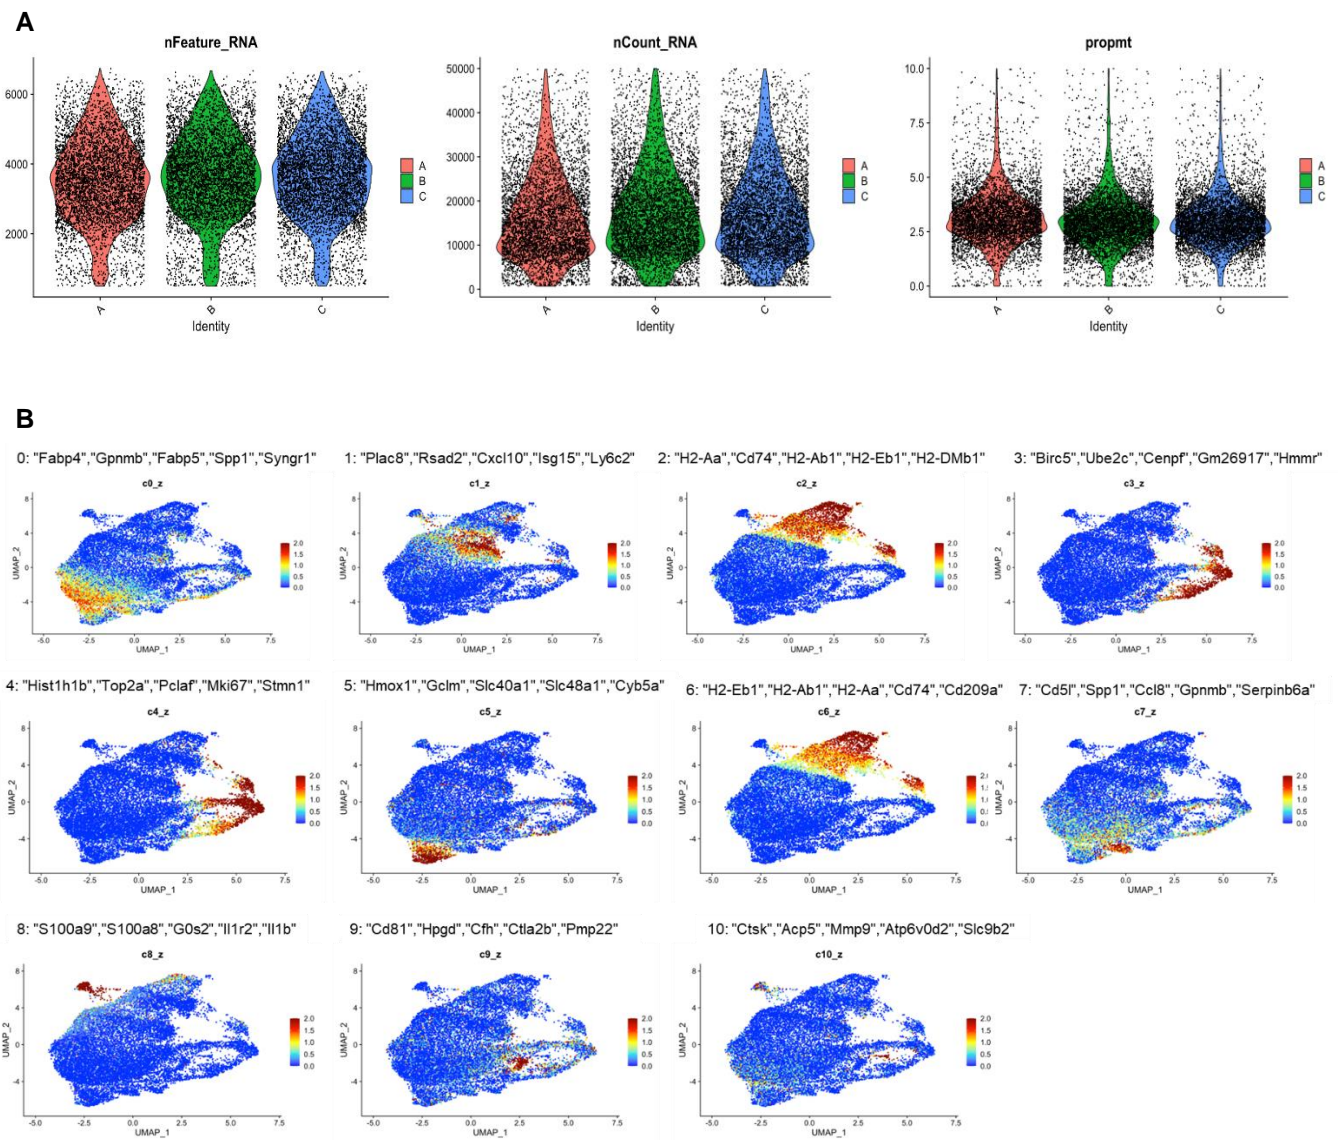

**Supplementary Figure S5. Assessments of scRNAseq data quality.** A) Quality control assessments performed on blinded/de-identified groups (A – isotype, B – Anti-CD14, C – Saline). B) Marker gene set z-scores for myeloid cell states (Clusters).



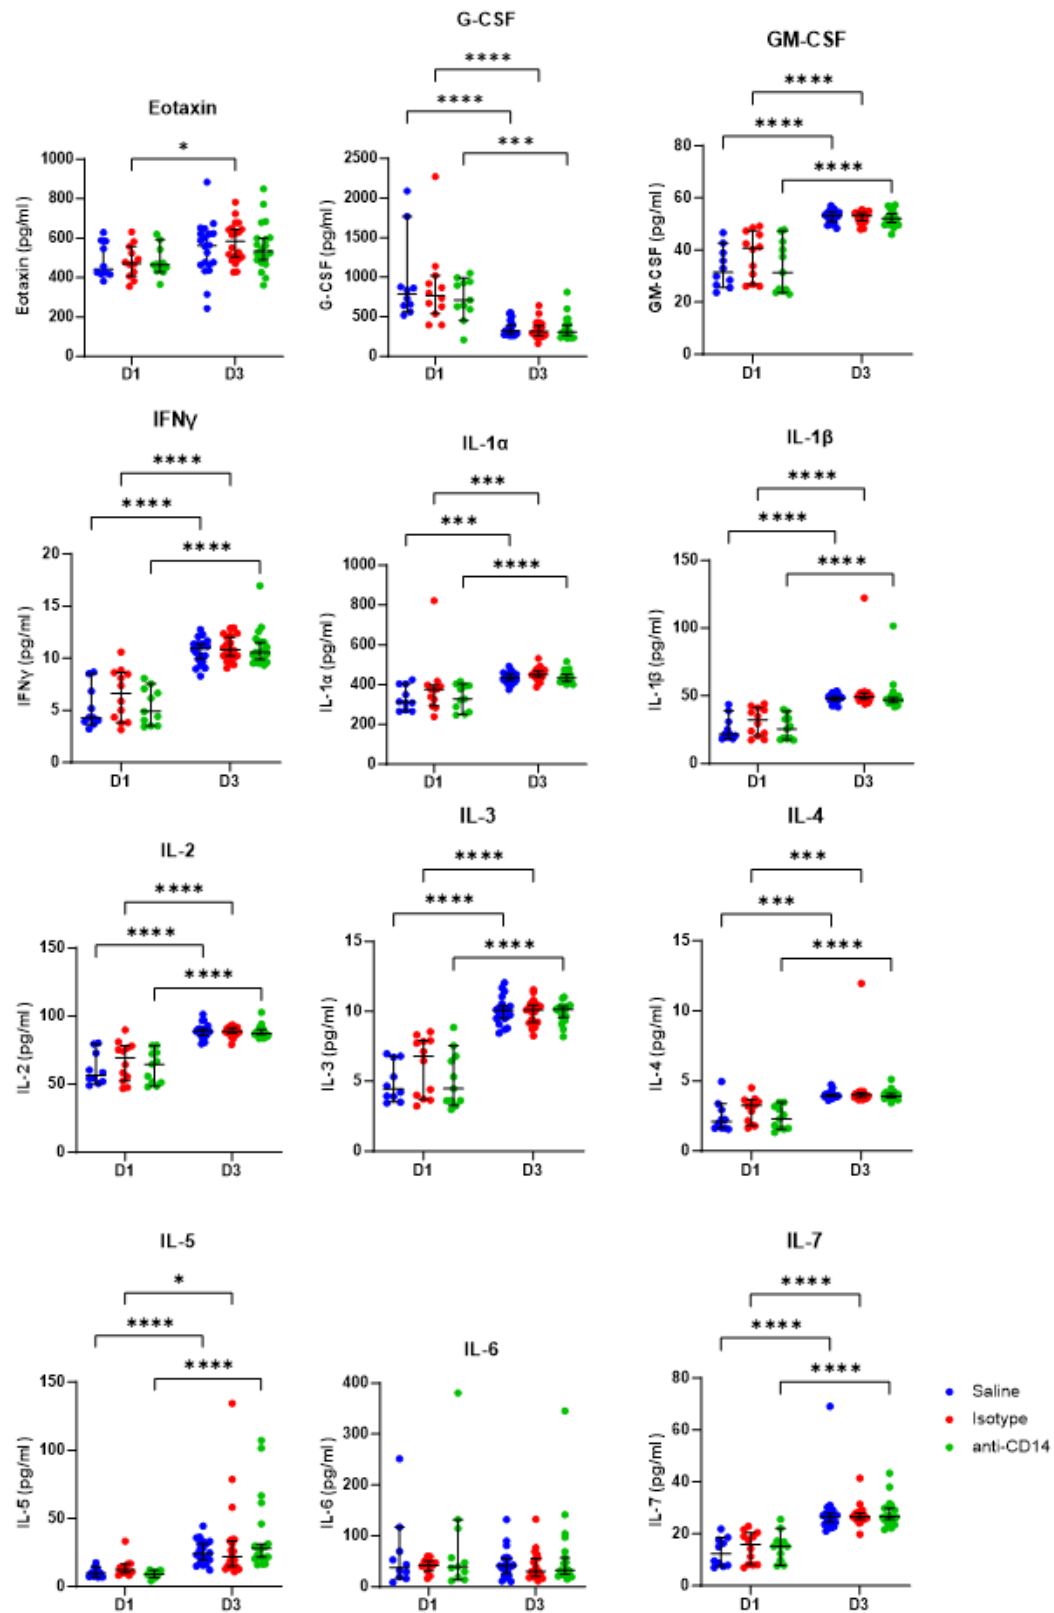

1

2 Supplementary Figure S6. Circulating Growth Factor and cytokine levels following CD14 Blockade at D1 and

3 D3 post-STEMI. Mean  $\pm$  SEM. p<0.05, \*\*\* p<0.001, \*\*\*\* p<0.0001.

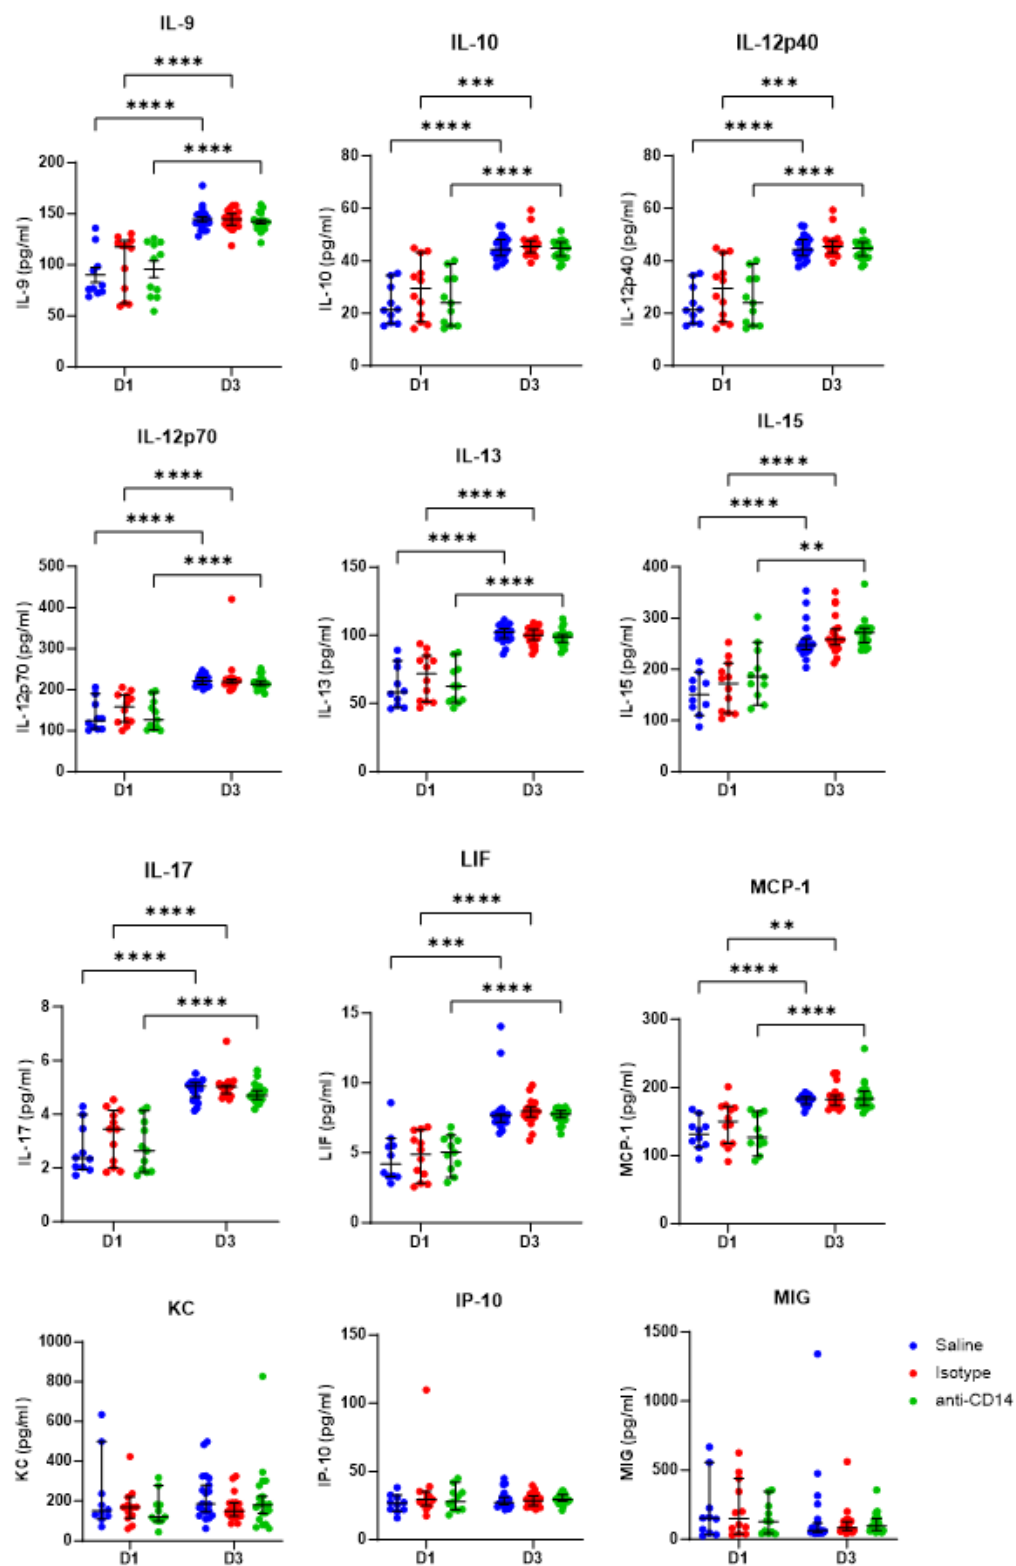

1

2 **Supplementary Figure S6. (continued) Circulating Growth Factors following CD14 Blockade at D1 and D3**

3 **post-STEMI.** Mean  $\pm$  SEM. \*\*p<0.01, \*\*\* p<0.001, \*\*\*\* p<0.0001.

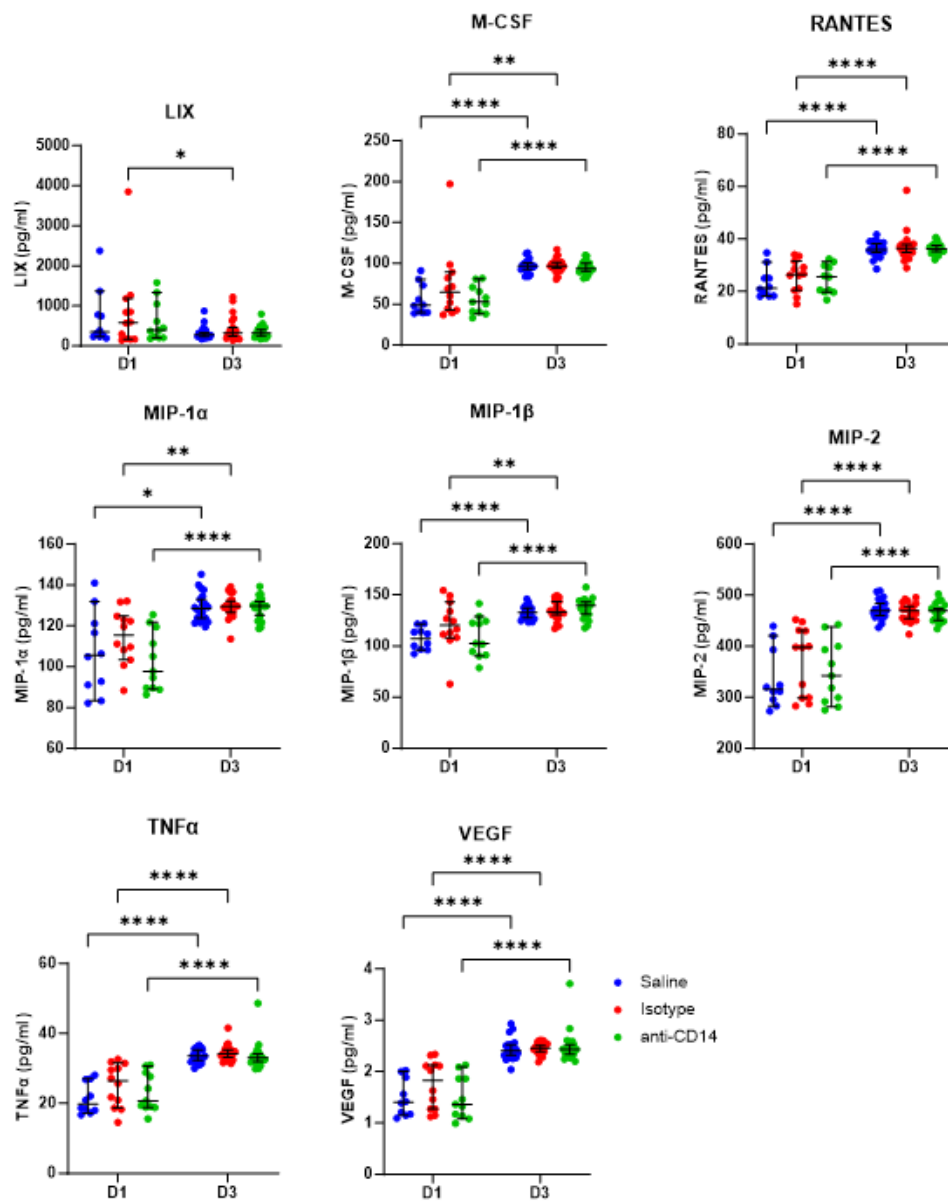

1  
2 **Supplementary Figure S6. (continued) Circulating Growth Factors following CD14 Blockade at D1 and D3**  
3 **post-STEMI. Mean ± SEM. \* p<0.05, \*\*p<0.01, \*\*\*\* p<0.0001.**

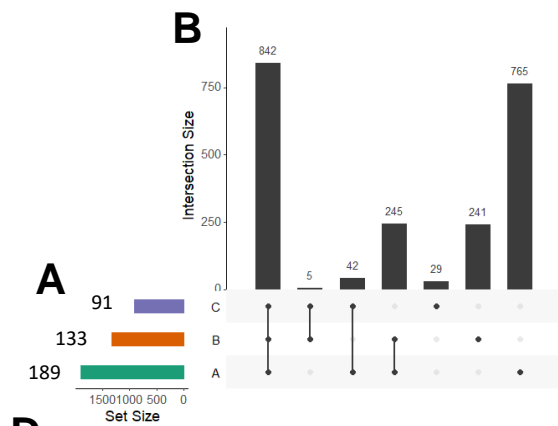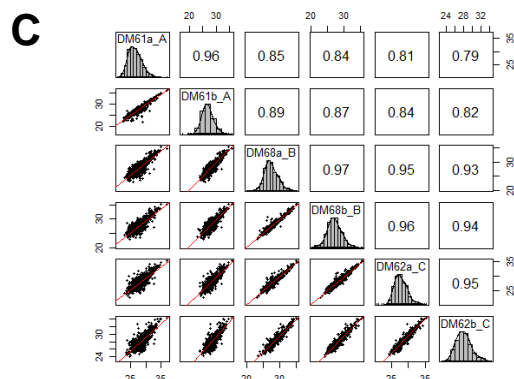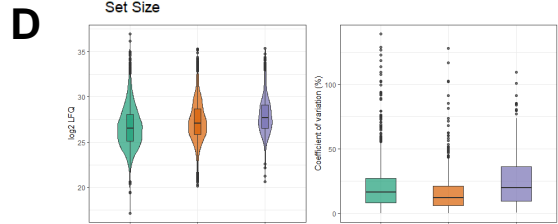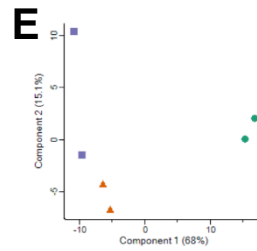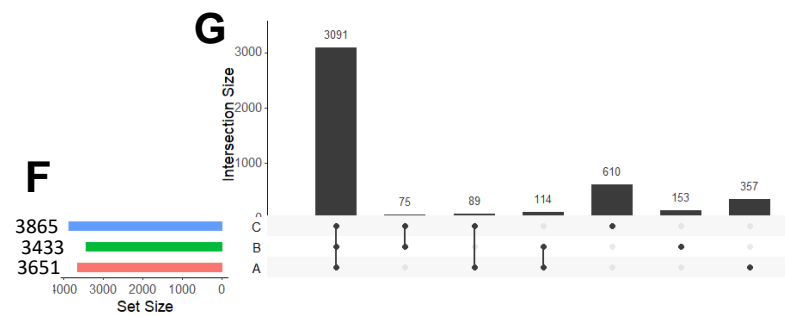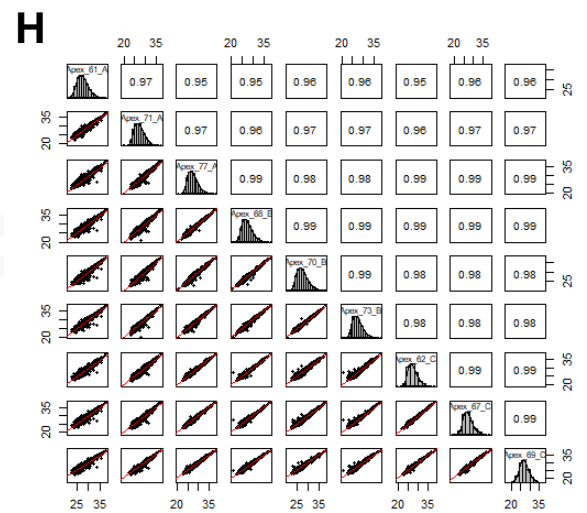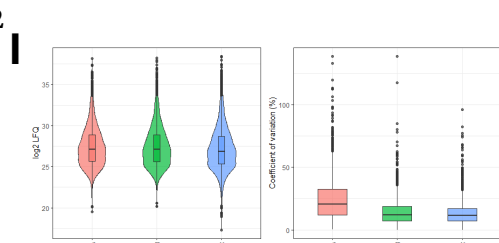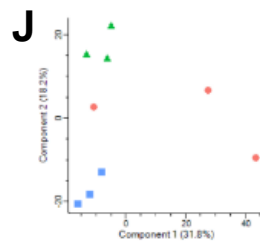



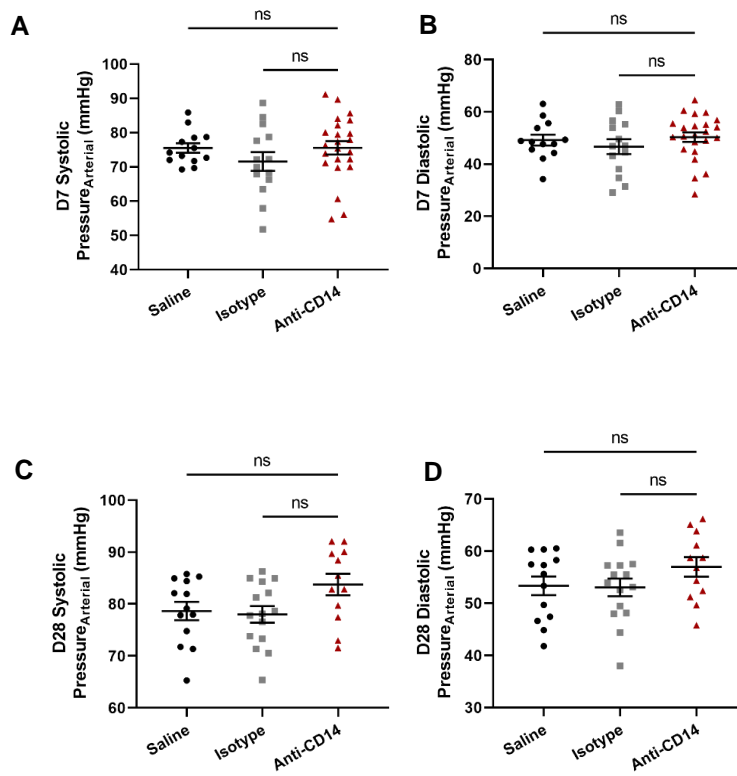

**Supplementary Figure S8. Invasive arterial systolic and diastolic pressures measured at either 7 days (D7, A and B) or 28 days (D28, C and D) post-STEMI during pressure-volume (PV) catheterization. Mean  $\pm$  SEM. ns – not significant.**

1

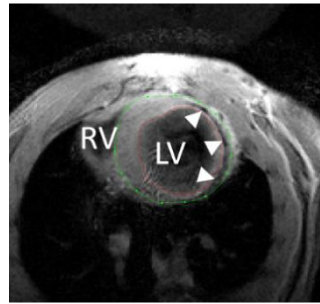

2

3 **Supplementary Figure S9. Cardiac magnetic resonance (CMR) imaging analysis example.** Endocardial borders  
 4 of the left ventricle (LV) are traced at end-diastole and end-systole to determine fractional change (ejection fraction  
 5 (EF%)). Epicardial borders are traced to define LV wall area (arrows). Note: After 21 days post-STEMI in this  
 6 model, severe left ventricular free-wall thinning precludes accurate measurement of expanded infarct size.

7

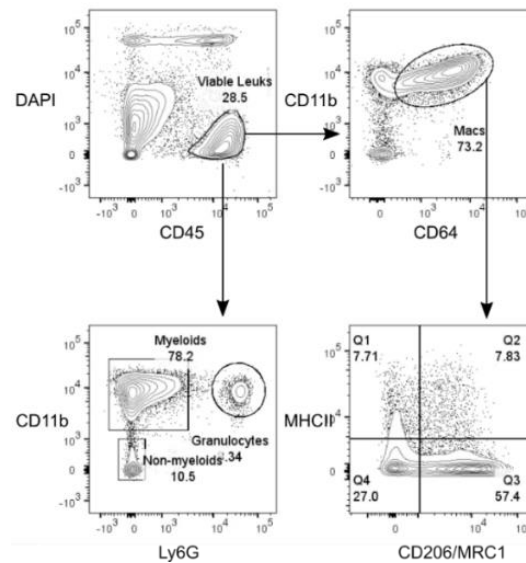

8

9 **Supplementary Figure S10. Flow cytometry approach.** Antibodies for CD45, CD11b, CD64, CD14, MHCII, MRC1  
 10 and Ly6G were used for sorting macrophages in flow cytometry experiments.
