# Supplementary material for: CD14 blockade in a translational model of reperfused ST-elevation myocardial infarction with key clinical features.
Source: Research Square preprint supplement (doi:10.21203/rs.3.rs-5545726/v1), 2025-03-19
Supplement: Supplementary file 2 [file e173eab250f81a7245787ab9.pdf]

# 1 ONLINE METHODS

## 2 Development of a murine anti-CD14 antibody for preclinical trials

3 To achieve CD14 blockade in mice, we developed and utilised an anti-mouse CD14 IgG2a  
4 monoclonal antibody (mAb) with 3 Fc region silencing mutations to cripple ADCC, CDC & ADCP  
5 function (biG53 LALA-PG; Implicit Bioscience Ltd, Seattle, WA, US)[1]. We expressed biG53  
6 LALA-PG mAb in CHO cells and affinity-purified to >95% purity (Fusion Antibodies, Belfast, UK).  
7 Inflammatory cytokine suppression with biG53 LALA-PG was evaluated by lipopolysaccharide  
8 (LPS) cytokine assays (360biolabs, Melbourne, AU). Receptor occupancy (RO) studies were  
9 performed (Hooke Laboratories, Lawrence, US) and the pharmacokinetic properties of biG53 LALA-  
10 PG mAb were determined following a single 5 mg/kg IP dose (at day 0) in C57BL6 mice. Serum  
11 biG53 LALA-PG levels were determined by capture ELISA (Hooke Laboratories) with data analysis  
12 using Phoenix WinNonlin software (Certara, Princeton, US).

## 13 Murine STEMI model of progressive LV systolic dysfunction and remodeling

14 All animal experimental work was performed in strict and routinely audited compliance with two  
15 multi-study applications approved by the precinct's Animal Ethics Committee (Projects: P1961 and  
16 P8295, Alfred Research Alliance, Melbourne, Australia). This study has been reported in line with the  
17 ARRIVE guidelines and in accordance with the National Institutes of Health (NIH) Guide for the  
18 Care and Use of Laboratory Animals.

19 ***In Vivo Pilot Study to Establish Dose Range:*** A pilot study was used to confirm an effective dose  
20 range (echocardiographic ejection fraction [% EF] 7 days post-STEMI as the primary endpoint, see  
21 **Supplementary Figure S2**), and for required sample size calculations for subsequent trials  
22 (SigmaPlot V10.0, Systat Software Inc., DE), expected [observed] difference in means: 5% EF,  
23 expected [observed] SD of residuals: 4% EF, number of groups: 3, desired power: 0.8 and alpha: 0.05.  
24 Computed sample size for one-way ANOVA = 14 per group).

A dose of 5 mg/kg IV anti-CD14 antibody (in 150 µl phosphate buffered saline) was used across all trials, except for the 28-day post-STEMI endpoint trial where 5 mg/kg weekly anti-CD14 dosages (given each week for 4 weeks) were given to maintain adequate receptor occupancy (RO; see **Supplementary Figure S1**) throughout the extended trial term. The same doses and volumes of IgG2a isotype in/and phosphate buffered saline vehicle were used across all trials as negative controls.

A total of 244 adult C57BL6 male mice (10±1 weeks of age; AMREP AS, Melbourne, AU) with STEMI were included in these studies. Multi-level randomisation and blinding protocols were implemented across all studies. Briefly, mice underwent STEMI surgery and were randomly allocated to groups receiving independently randomised, prepared and blinded treatments (i.e. 150 µl saline, isotype or anti-CD14 coded as A, B or C uniquely for each separate sub-study). Accordingly, all procedures were performed, all samples/images/traces were collected, all data were statistically analysed, and each trial (Pilot, D7, D28, D1 and D3; in order of completion) was individually reported to the trial sponsor while coded treatment blinding was maintained. An additional 10 age-matched sham-operated animals have been included in figures below where appropriate (n=5 in 7-day, and n=5 in 28-day post-STEMI trial) to provide reference values only (analysed post-hoc after unblinding and omitted from original statistical analyses, presented herein). For cohort sizes, see **Supplementary Table S1**. All procedures were performed at approximately the same time of day across all cohorts in order to limit diurnal variation in the inflammatory response.

***Model of Anterior ST-segment Elevation Myocardial Infarction (STEMI) with Reperfusion:*** To investigate the efficacy of CD14 blockade in ischemic heart failure, we refined an existing preclinical model of reperfused MI[2, 3] with hallmarks of clinical STEMI, including classical ST-elevation,[4] and progressive LV systolic dysfunction, dilatation and haemodynamic decompensation.[5]

Briefly, mice underwent a surgical procedure to have the left anterior descending (LAD) coronary artery (CA) reversibly ligated for 1 h to induce ischemia followed by reperfusion, confirmed by classical ST-elevation by EKG at each surgery (**Figure 1A, text**). Additionally, quantitative spatial assessment of stunned LV myocardium by echocardiographic endocardial displacement mapping (a

non-invasive surrogate of planimetric area-at-risk; AAR, **Supplementary Figure S3**) was performed 24 h post-surgery and confirmed the predetermined inclusion criteria for each animal (i.e. AAR of 35-55 %, inclusive; **Supplementary Figure S3**).

In detail: Mice were anesthetized with a single IP injection Ketamine/Xylazine/Atropine cocktail (K: 80-100 mg/kg, X: 16-20 mg/kg, A: 1-1.2 mg/kg (Troy Laboratories Pty Ltd, Glendinning, AU)). Once anesthetized, each mouse was intubated with a tracheal cannula, shaved, prepared for surgery with chlorhexidine (5%; Perrigo Australia, Bolcatta, AU). The mice were placed onto a heated surgical table and ventilated using a Minivent mouse ventilator (150 strokes/min, 225 – 250 ul stroke volume, Hugo Sacks Elektronik, March-Hugstetten, DE). A single intradermal injection of local anesthetic (bupivacaine, 2 mg/kg; Pfizer Inc, New York, US) was provided at the surgical site. The chest was opened via left thoracotomy (3-4 mm incision) and retracted (6-8 mm). The left anterior descending coronary artery was visualized by surgical microscope (Opmi, Pico Zeiss; Carl Zeiss Meditec AG, Jena, DE), ligated (7-0 silk suture, Ethicon LLC, San Lorenzo, US), and tied through exteriorized releasing loops. The chest and skin were then closed (6-0 prolene; Ethicon LLC, San Lorenzo, US), and xylazine reversed (single injection of atipamezole: 0.2 mg/kg, SC; Zoetis Australia Pty Ltd, Rhodes, AU). Mice were then provided diuretic (single injection of furosemide: 3-5 mg/kg, SC; Troy Laboratories Pty Ltd, Glendinning, AU), transferred to an advanced care suite to continue constant ventilation, core temperature monitoring (rectal probe) and management, and EKG recording to confirm ST-elevation during the ischemic period. After 60 minutes of ischemia, exteriorized loops were pulled to release the ligation, immediately following administration of a single 150 ul IV bolus of phosphate-buffered saline (Sigma-Aldrich, Stenheim, DE), [saline vehicle, 0.9 % w/v], 5 mg/kg IgG2a [isotype control in vehicle], or 5 mg/kg anti-CD14 [in vehicle]. A second dose of antibody or control treatments were given 24 h later in all cohorts except for the 28-day studies (where single, weekly injections were administered either IV [at reperfusion] or IP [at subsequent doses]).

Approximately 20-24 surgeries were performed per cohort. To maximize study rigor[6], each cohort was randomized and independently blinded treatments were equally distributed within each cohort to

account for risk of batch effect. During randomization of each study, sham-operated animals were included for surveillance of temporal reproducibility of the model between cohorts (assessed by 24 h echocardiographic assessment of area-at-risk, described below. (Data presented in **Supplementary Figure S3**). Sham animals had all steps of the STEMI surgery performed except for ligation of the coronary artery and were administered 150 ul IV bolus of 0.9 % phosphate buffered saline.

***Predefined inclusion/exclusion criteria applied to each trial (including pilot study):*** All reported trial protocols, experimental methods and outcome measures were pre-registered with the trial sponsor (Implicit Bioscience Ltd, Australia) prior to commencing experiments. Along with treatment randomization and blinding, predefined inclusion and exclusion criteria were applied throughout all studies presented in this report.

Whole animal datasets were included based on the following two criterion:

- *Qualitative:* Presence of ST-elevation observed (immediately post-MI surgery, **Figure 1, text**), and
- *Quantitative:* Relative Negative Wall Displacement between 35 – 55% (24 h echocardiography, **Supplementary Figure S3**).

Factors associated with endpoint technical insufficiency were pre-defined as the only grounds for endpoint data exclusion:

- *Endpoint data:* Technically insufficient imaging/recording for analysis e.g. unsuccessful catheter insertion, computer failure/crash, unsuccessful histology sectioning.

Mice that either did not survive or were euthanized within the first hour post-surgery (i.e. before treatment) were excluded from analysis. Note: All deaths in these trials occurred prior to treatment due to acute surgical complications i.e. no animals (0) died after receiving saline/isotype/anti-CD14 prior to their planned endpoint.

## 1 ***In vivo procedures***

2 ***Electrocardiogram (EKG; D0 <15 mins post-STEMI surgery):*** 3-lead EKG needle probes were  
3 placed under the skin to record up to 5 mins of EKG tracing (AD Instruments, Bella Vista, AU) to  
4 confirm ST elevation immediately post-STEMI surgery.

5 ***Echocardiography (D1, D3, D7 (incl. pilot) and D28 post-STEMI):*** Mice were anaesthetized with  
6 isoflurane (4.0% induction, 1.6-1.8% maintenance; Pharmachem, Eagle Farm, AU) and  
7 comprehensive single-plane echocardiography studies of left ventricular (LV) systolic function were  
8 performed using the Vevo 2100 system (VisualSonics, Fujifilm, CA) by a senior imaging specialist.  
9 D1 echocardiography was analyzed to confirm ischemic area homogeneity (using our validated  
10 endocardial displacement mapping technique, an emerging gold standard for the screening of MI  
11 model homogeneity, and surrogate for post-mortem planimetric AAR determination at our centre). All  
12 analyses of ultra-high-frequency parasternal long-axis loops (EKG-gated Kilohertz Visualization  
13 [EKV] for D1 wall displacement mapping) were critically performed offline by two independent  
14 observers[7], using the manufacturer software (VevoLab V5.0, VisualSonics, Fujifilm, CA).

15 ***Cardiac catheterization and hemodynamic assessment (D7 and D28 post-STEMI):*** Mice were  
16 anesthetized with isoflurane (4.0% induction, 1.6-1.8% maintenance) and an intracardiac catheter  
17 (SPR-839 Millar, Houston, US) was passed via the right carotid artery into the ascending aorta to  
18 measure arterial pressures, before being advanced into the left ventricle to measure left ventricular  
19 pressures and conductance. End-systolic and end-diastolic PV relationships were observed by  
20 compressing the abdominal aorta through the sub-hepatic space. Parallel conductance was corrected  
21 for using hypertonic saline infusion into the right jugular vein (5-10  $\mu$ l) prior to cardiac puncture.  
22 Blood was used to construct a conductance standard curve in calibration cuvette wells of known  
23 volumes. Comprehensive hemodynamic analysis was performed offline and validated  
24 (Supplementary Figure S8).

**Cardiac magnetic resonance (CMR) imaging (D21 post-STEMI):** For superior spatial resolution assessments of LV structure and function,[8-10] CMR was performed in a cohort of animals at 21 days post-STEMI in the 28-day endpoint cohort. Mice were anaesthetized with isoflurane (4.0% induction, 1.6-2.0% maintenance) and CMR imaging was performed using a 9.4 T Magnetic Resonance Imaging system. Sequences were developed and performed using Paravision 360 V3.3 (Bruker, Karlsruhe, DE). The temperature of the mice was maintained by a circulating warm water blanket, and leads and probes applied (3-lead surface EKG, rectal probe, respiration pad). Following localizer and planning scans, brightblood sequences were used to establish 2-chamber, 4-chamber, and then short-axis views of the heart. A 5-section stack of short-axis blackblood cine images was acquired for each mouse using intragate to achieve 10 timeframes for each section. All CMR images were analyzed using Segment V3.2, R8757 (Medviso, Sweden). An example of CMR imaging analysis can be seen in **Supplementary Figure S9**.

**Blood sampling (D1 and D3 post-STEMI):** A closed-chest heparinized cardiac puncture was performed (via the right ventricle) under anesthetic in order to collect whole blood for plasma spin-down and storage at -80°C before further examination.

## **Post-mortem assessments**

**In situ staining for area-at-risk/infarct size measurement (D1 post-STEMI):** Following cardiac puncture, the chest was opened and ascending aorta cannulated for infusion of the coronary arteries with saline followed by retying of the ligation and infusion of 3% Evans blue dye (Sigma-Aldrich, Stenheim, DE) before heart excision. LVs were dissected and snap frozen. Later the LVs were cut into 6-8 sections of ~1 mm thickness and incubated in Evans blue/1% tri-tetrazolium chloride (EB/TTC; Sigma-Aldrich, Stenheim, DE) for 1 h at 37°C. Heart sections were then imaged on a flatbed scanner (both sides averaged) and analyzed by semi-volumetric planimetry (Fiji, ImageJ V1.53; NIH, US) to measure areas of total tissue (red + white + blue), ischemic tissue/area-at-risk (AAR; red + white/beige) and infarcted tissue (white/beige). At least 15 hearts per group were included in these infarct assessment studies to detect an effect size (infarct % AAR) of  $\geq 15\%$  ( $\alpha 0.05$ ,  $\beta 0.8$ ).

1 ***Autopsy and tissue collection (D1, D3, D7 and D28 post-STEMI):*** Animals were killed using an  
2 excess of anesthetic, and/or exsanguination, and/or removal of organs under anesthesia.  
3 Comprehensive autopsies were performed for all mice, including weighing of lungs, kidney, liver and  
4 spleen, measuring of tibia lengths and recording of post-mortem observations. Blinded visual  
5 assessments for presence of atrial thrombus, lung congestion, evidence of infection, and cardiac  
6 (ventricular) rupture were recorded.

7 ***Heart collection for dissection (D3, D7 and D28 post-STEMI):*** Following cardiac puncture, a heart  
8 dissection was performed to separate, clean and weigh individual chambers. A mid-ventricular  
9 transverse ring of the left ventricle was committed to histology (detailed below), and apical/infarcted  
10 ventricle stored at -80°C for future experiments.

11 ***Circulating Growth Factor measurements (D1 and D3 post-STEMI):*** Frozen plasma samples were  
12 analyzed using quantitative cytokine array 32-plex Discovery Assay® (Eve Technologies, Calgary,  
13 CA).

14 ***Left ventricle histology (D3, D7 and D28 post-STEMI):*** Complex sectioning was performed to  
15 produce replicate slides of left (mid-) ventricular sections. Tissues were processed and embedded in  
16 paraffin. 4 um thick sections were cut, stained, imaged, and analyzed by blinded personnel.  
17 Histological staining of a single left ventricular section per heart using Masson's trichrome and  
18 picrosirius red was performed, along with fluorescence immunohistochemistry using antibodies  
19 recognizing CD68 (monocytes/macrophages) or troponin T (cardiomyocytes), with the nuclei  
20 identified using DAPI. Immunofluorescent imaging was performed at 20x magnification with an  
21 VS120 Slide-scanning Microscope (Evident (Olympus Scientific Solutions), Tokyo, Japan). All  
22 histology was analyzed for positive staining area (brightfield imaging), or positive cell count and  
23 proportion (%), immunofluorescent imaging) using Fiji (ImageJ V1.53; NIH, US). Suppliers of  
24 (immuno)histology reagents can be found in **Supplementary Table S2**.

**Flow cytometry and cell sorting (D3 post-STEMI):** LV apexes from each heart were dissected and placed in cold 1X HBSS (14025092, Gibco; ThermoFisher Scientific, Grand Island, US,). Using scissors, tissue was minced into ~1 mm sized pieces and placed in 5 ml Eppendorf tubes containing 1 ml cold 2 mg/ml collagenase IV (CLS4, Worthington Biochemical Corporation, Lakewood, US) and 1 mg/ml Dispase II (04942078001, F. Hoffmann-La Roche AG, Basel, CH) in PBS supplemented with 0.9 mM CaCl<sub>2</sub> (Sigma-Aldrich, Stenheim, DE). Tissue was digested in a 37°C water bath for 45 minutes during which trituration was performed using a 1 ml pipette at 15-minute intervals. The cell suspension was filtered through a 75 µm mesh, atop 50 mL conical tubes placed on ice, into 45 mL of PBS with 0.9 mM CaCl<sub>2</sub>. Debris clearance was performed at 200×g, 4°C for 15 minutes at maximum acceleration but with the brake off. The pellet was left in ~5 ml of volume after aspiration and an additional 1 ml of 2% FCS (heat inactivated and filtered; ThermoFisher Scientific, Grand Island, US) in 1X HBSS was added for resuspension. Cells were centrifuged at 400×g, 4°C for 4 minutes with maximum acceleration and braking, and resuspended in 2% FCS in HBSS for antibody staining.

Cells were identified using antibodies and viability dye (DAPI). Prior to flow cytometry and sorting, cells were strained through 35 µm filter tops into FACS tubes (Corning, 352235, Sigma-Aldrich, Stenheim, DE). Flow cytometry was performed on a BD LSR Fortessa™ X-20 Special Order (BD Biosciences, San Jose, US) at the Baker Heart and Diabetes Institute and analyzed using FlowJo (v10.8.0; BD Biosciences, Ashland, US). Viable leukocytes were gated using DAPI exclusion (DAPI-) and CD45+ staining. Leukocyte subtypes were identified using antibodies recognizing CD11b, CD14, CD64, Ly6G, MHCII and CD206 (**Supplementary Figure S10 and Supplementary Tables S3 and S4**).

**Single cell (macrophage-specific) RNA sequencing (D3 post-STEMI):** Sorting of macrophages for scRNAseq was performed on a BD FACSARIA Fusion Cell Sorter (BD Life Sciences, San Jose, US) at the Alfred Research Alliance Flowcore. For each treatment group, ~10,000 cells were loaded into each lane for single cell partitioning in the 10x Genomics Chromium Controller (10x Genomics, Pleasanton, US). Gene expression libraries were prepared using Chromium Next GEM Single Cell 3'



v 3.1 Gene Expression kit (PN-1000268; 10x Genomics, Pleasanton, US), microfluidic chip (PN-1000127, 10x Genomics, Pleasanton, US) and indices (PN-1000215, 10x Genomics, Pleasanton, US) following manufacturer guidelines. Libraries were sequenced on the NovaSeq6000 (Illumina, San Diego, US) at the Alfred Research Alliance Sequencing Platform at a read depth of ~50,000 reads per cell. ~6,000 cells and ~3,500 genes/cell were recovered from each group.

CellRanger output was used to create Seurat objects (v4) in R and data from three libraries was merged into a single Seurat object. Quality control was performed and cells with  $500 < \text{nFeature\_RNA} < 7000$ ,  $\text{percent.mt} < 10$  (**Supplementary Figure S5**), and  $\text{nCount\_RNA} < 50000$  were kept for downstream analysis. Merged data was then normalized using SCTransform regressing out  $\text{percent.mt}$  and  $\text{nCount\_RNA}$ , then a principal component analysis ( $n = 50$ ), uniform manifold approximation (UMAP) embedding, and subsequent clustering was performed. Differential expression analysis was used to identify non-myeloid contaminating populations which were then removed. After removing these contaminating clusters, normalization, PCA, UMAP, and clustering was re-computed. DE analysis was performed at various cluster resolutions and a heatmap of cell state marker genes constructed. For each myeloid cell state, z-scores for the top 5 marker genes were calculated and overlaid on the UMAP embedding to assess cell state separation.

Comparing across conditions: A cell composition plot of cell states was computed to identify changes in cluster composition across 3 experimental conditions. To observe phenotype shifts with anti-CD14 treatment, density plots were computed and overlaid in UMAP space using scanpy. To dissect changes in the transcriptional signatures after anti-CD14 treatment relative to isotype control, a differential expression analysis was performed across all myeloid cells states. The genes downregulated (statistically significant adjusted p-value  $< 0.05$ ) in the anti-CD14 treated group was used to construct a gene set score and plotted in UMAP space to assess cell states which are deleted in the setting of anti-CD14 treatment.

1 A dotplot was plotted for this signature to isolate cell states which expressed the highest value. These  
2 genes were then used to create a bulk average expression heatmap (row normalized) grouped by anti-  
3 CD14, isotype, and saline.

4 Palantir was used for pseudotime trajectory analysis using Ly6c2 high monocytes as the starting state,  
5 number of waypoints as 500 and all other parameters were the default as per Palantir package. All  
6 subsequent pseudotime visualization was performed in Python within the Palantir package.

7 ***Single cell (macrophage-specific) and whole tissue proteomics (D3 post-STEMI):*** Whole/bulk  
8 cardiac tissue (left ventricular infarcted apex) was lysed in 8 M urea (ThermoFisher Scientific, Grand  
9 Island, US), 50 mM HEPES (ThermoFisher Scientific, Grand Island, US) pH 8.0, supplemented with  
10 HALT protease and phosphatase inhibitor (78442, ThermoFisher Scientific, Grand Island, US)  
11 solubilized by tip-probe sonication on ice. Flow sorted macrophage cell populations were lysed in 6  
12 M urea, with 50 mM HEPES pH 8.0 with HALT protease and phosphatase inhibitor (78442 Pierce;  
13 ThermoFisher Scientific, Rockford, US). The protein concentration of all samples was quantified by  
14 microBCA (ThermoFisher Scientific, Grand Island, US). A highly sensitive Sera-Mag-based  
15 workflow (magnetic carboxylate modified particles (65152105050250, 45152105050250, Cytiva,  
16 Lane Cove West, AU) was employed to streamline enzymatic Lys-C and tryptic digestion of samples  
17 (10 µg whole cardiac tissue, 3 µg macrophage). Peptides were quantified by Fluorometric Peptide  
18 Assay (23290 ThermoFisher Scientific, Grand Island, US) and samples normalized for immediate  
19 analysis. Peptides were analyzed on a Dionex UltiMate NCS-3000RSLC nanoUHPLC (ThermoFisher  
20 Scientific, San Jose, US) coupled to high-resolution Q-Exactive HF-X hybrid quadrupole-Orbitrap  
21 mass spectrometer equipped with a nanospray ion source (ThermoFisher Scientific, San Jose, US) in  
22 data-dependent acquisition analysis over 110 minutes in positive mode. Internal calibration/standards  
23 were pre-run to establish instrument performance. Bioinformatic analysis was performed using  
24 established highly stringent analysis pipelines for quantitative proteomic data analysis, involving data  
25 normalization, quantitation, and differential analysis. Proteomics raw data are available from the

1 ProteomeXchange Consortium via the PRIDE partner repository (<http://www.proteomexchange.org/>);  
2 PXD041192.

### 3 **Statistical Analysis**

4 All biometric, physiological, histological, and cytometric data were analysed using GraphPad Prism  
5 (V9.4.1; GraphPad.com, San Diego, US) using one-way ANOVA with Tukey multiple comparisons  
6 post-hoc tests to compare STEMI groups only i.e. saline- vs isotype- vs anti-CD14-treated.  
7 Homogeneity of variance was assessed for all reported parameters using Brown-Forsythe testing, and  
8 Kruskal-Wallis (non-parametric) testing where appropriate. After each blinded and randomised trial  
9 was reported to the trial sponsor, a cohort of saline-treated sham-operated animals (performed within  
10 the same experiments) was analysed post-hoc and included for reader reference only (accordingly  
11 omitted from statistical analyses, other than for description of the STEMI model phenotype where  
12 comparisons were made between saline-treated sham control and saline-treated STEMI groups using  
13 Student's T-tests). All data are presented as mean  $\pm$  SEM.

14 Circulating cytokine and growth factor levels are presented as median (Q1-Q3), with Mann-Whitney  
15 U tests to compare D1 and D3 data (p-values are adjusted for multiple comparisons) and Kruskal-  
16 Wallis tests to compare between saline, isotype and anti-CD14 groups.

17 Proteome intensities were processed via VSN normalisation method (Limma package) in R. For  
18 proteomics analyses the Human Protein Atlas ([https://www.proteinatlas.org/human proteome/tissue](https://www.proteinatlas.org/human%20proteome/tissue))  
19 and functional enrichment annotations using g:Profiler (<https://biit.cs.ut.ee/gprofiler/>) were used.  
20 Further pathway enrichment map analysis was performed using Cytoscape (v3.7.1), Reactome, and  
21 DAVID functional annotation software. Specifically for macrophage proteome, t-statistic of DE  
22 analysis was subjected to 1D enrichment analysis in Perseus software for functional enrichment of  
23 Gene Ontology Biological Processes (GOBP), Cellular components (GOCC) and Molecular Functions  
24 (GOMF). For cardiac apex proteome, differentially regulated proteins ( $p < 0.05$ ) were used for  
25 functional enrichment analysis in Cytoscape StringApp focusing on gene ontology (GOBP, GOCC,

GOMF) and pathways (KEGG, Reactome, Wikipathway). Data visualisations were completed using either Cytoscape or R (ggplot2 package).

### References for online methods and supplementary material

1. Lo, M., et al., *Effector-attenuating Substitutions That Maintain Antibody Stability and Reduce Toxicity in Mice*. J Biol Chem, 2017. **292**(9): p. 3900-3908.
2. Chen, J., et al., *Variability in coronary artery anatomy affects consistency of cardiac damage after myocardial infarction in mice*. Am J Physiol Heart Circ Physiol, 2017. **313**(2): p. H275-H282.
3. Lindsey, M.L., et al., *Reperfused vs. nonreperfused myocardial infarction: when to use which model*. Am J Physiol Heart Circ Physiol, 2021. **321**(1): p. H208-H213.
4. Xin, A., et al., *Significance of QRS scoring system in left ventricular function recovery after acute myocardial infarction*. ESC Heart Fail, 2024. **11**(5): p. 2778-2788.
5. Gaudron, P., et al., *Progressive left ventricular dysfunction and remodeling after myocardial infarction. Potential mechanisms and early predictors*. Circulation, 1993. **87**(3): p. 755-63.
6. Weeks, K.L., et al., *CORP: Practical tools for improving experimental design and reporting of laboratory studies of cardiovascular physiology and metabolism*. Am J Physiol Heart Circ Physiol, 2019. **317**(3): p. H627-H639.
7. Donner, D.G., et al., *Improving the quality of preclinical research echocardiography: observations, training, and guidelines for measurement*. Am J Physiol Heart Circ Physiol, 2018. **315**(1): p. H58-H70.
8. Tao, B., et al., *Preclinical modeling and multimodality imaging of chronic myocardial infarction in minipigs induced by novel interventional embolization technique*, in *EJNMMI Research*. 2016, Springer Berlin Heidelberg. p. 59.
9. Frantz, S., et al., *Left ventricular remodelling post-myocardial infarction: pathophysiology, imaging, and novel therapies*. Eur Heart J, 2022. **43**(27): p. 2549-2561.
10. Flachskampf, F.A., et al., *Cardiac imaging after myocardial infarction*, in *European Heart Journal*. 2011, Oxford University Press. p. 272-283.
